# 1 **Impaired Scaling of Step Length in Parkinsonian Postural Instability**

2 Robert A. McGovern, MD<sup>1</sup>, Juan C. Cortés, MD<sup>2</sup>, Anne P. Wilson, MD<sup>3</sup>, Guy M. McKhann II,  
3 MD<sup>3</sup>, Pietro Mazzoni, MD PhD<sup>4</sup>

4  
5 Affiliations:

6 1. Department of Neurosurgery, University of Minnesota, Minneapolis, MN

7 2. Department of Neurology, Johns Hopkins University, Baltimore, MD

8 3. Departments of Neurology and Neurosurgery, Columbia University, New York, NY

9 4. Department of Neurology, Washington University in St. Louis, St. Louis, MO

10

11 Corresponding author:

12 Pietro Mazzoni

13 Washington University in St. Louis

14 660 S. Euclid Ave., CB 8111

15 St. Louis, MO 63110

16 Phone: 314-747-7036

17 Email: [mazzonip@wustl.edu](mailto:mazzonip@wustl.edu)

18

19 Word Count: [Abstract: 250; Body: 3670]

20

21 Running Title: Hypokinesia in parkinsonian postural instability

22

23 Keywords: Pull test; Parkinson's disease; Motor control; Bradykinesia; Falls

24

25 Financial Disclosure/Conflict of Interest: The authors do not have any financial information to  
26 disclose related to the work described in this article.

27

28 Funding Sources: This study was supported by grants from the Parkinson's Disease Foundation  
29 and the Doris Duke Charitable Foundation.

30

31 **Abstract**

32 Background: Postural stepping is an important strategy for recovery of balance in response to  
33 postural perturbations. It is disrupted by Parkinson's disease (PD) and other conditions. The  
34 nature of this disruption remains poorly understood. Understanding the motor control nature of  
35 this impairment can guide the development of novel interventions.

36 Objectives: To identify the motor control abnormalities responsible for parkinsonian impairment  
37 of postural stepping.

38 Methods: We studied four groups of participants: control, aged, PD, and normal-pressure  
39 hydrocephalus (NPH). We performed kinematic analysis of postural stepping by recording  
40 participants' body motion during a modified version of the clinical pull test, which was  
41 performed multiple times with different amounts of pulling forcefulness.

42 Results: Successful postural stepping in the control group was accompanied by linear scaling of  
43 their first step's length and latency to the body's initial motion: more forceful pulls caused larger  
44 initial body acceleration, which resulted in longer steps that began earlier. PD patients exhibited  
45 reduced scaling of step length: they maintained normal reaction time but took steps that were  
46 inadequately short. Reduced step length scaling was present, but less severe, in aged individuals,  
47 and was more severe in NPH patients. Aged individuals and PD patients exhibited partial  
48 compensation for reduced step length scaling: their step length included a component that was  
49 independent of initial body acceleration, which was absent in control and NPH groups.

50 Conclusions: the impairment of postural stepping caused by PD and related conditions is due to  
51 inadequate scaling of movement amplitude and is thus a form of hypokinesia.

## 52 **Introduction**

53 When standing in a bus that starts moving, we must sometimes take a step back to avoid falling.

54 This behavior is an example of the postural stepping response, an important motor strategy that  
55 helps us maintain balance in response to postural perturbations.

56 We can counter small perturbations by adjusting our body's geometry without moving our feet  
57 (hip and ankle strategies) [1]. These strategies are inadequate, however, for a variety of  
58 perturbations encountered in daily life, such as stumbling on a curb, being nudged when standing  
59 in a crowd, and stepping off an escalator. Postural stepping is a commonly used strategy when  
60 there are no constraints on foot movement [2]. It can counter a wide variety of perturbation types  
61 and magnitudes [3,4], as it allows balance recovery by changing the body's base of support.

62 Balance disorders are an important cause of falls, which in turn are a major cause of morbidity,  
63 mortality, and reduced quality of life in the elderly and in patients with neurologic disorders [5–  
64 7]. The balance disorder caused by Parkinson's disease (PD) and related conditions  
65 (parkinsonism) is characterized by impaired postural stepping, as exhibited in inadequate  
66 responses to the pull test [8]. The nature of this impairment, however, remains unclear.

67 Studies of postural stepping in PD patients [9–14] have identified reduced static sway before  
68 stepping [9], particular susceptibility to backwards perturbations [15], and abnormally  
69 coordinated responses (simultaneous activation of ankle, hip and trunk muscles) to surface force  
70 plate translation [9,11,12]. PD patients also exhibit anticipatory lateral postural adjustments,  
71 later-onset and shorter steps [16,17], increased weight shift time, and a base-width neutral step  
72 [18]. These varied abnormalities do not readily point to a motor control problem responsible for  
73 impaired postural stepping.

74 In spite of the complex sensory processing and precisely coordinated force control required to  
75 maintain balance, postural stepping can be described rather simply at the task level in kinematic  
76 terms: as the body moves away from its base of support, a step is taken to extend the base of  
77 support and counter the body's falling motion. The relevant perturbation is the body's movement  
78 away from a stable configuration, regardless of the nature and magnitude of the force that caused  
79 this perturbation. The relevant response is placement of the foot in the appropriate position and at  
80 the appropriate time to counter the body's motion. Successful postural stepping may thus be  
81 explained by a kinematic account, i.e. by relationships between initial body motion and  
82 kinematic features of the stepping response.

83 An interesting feature of normal postural stepping is that, when pulled backwards at the waist  
84 with different force magnitudes, the step length of control participants increases as force  
85 increases [19]. This finding suggests that a scaling relationship exists between magnitude of  
86 postural perturbation and the stepping response. We thus hypothesized that successful postural  
87 stepping can be described by a kinematic control policy: when posture is perturbed, a step is  
88 taken with appropriate amplitude and latency to stop the body's motion.

89 If normal postural stepping can be described kinematically, then perhaps its impairment seen in  
90 PD and other conditions has a kinematic explanation: are the steps of postural stepping too short,  
91 too slow, or too late, to stop the body from falling? Such a kinematic account of postural  
92 stepping impairment would link parkinsonian postural instability to bradykinesia, a complex of  
93 motor symptoms that includes slowness (bradykinesia itself), reduced amplitude (hypokinesia),  
94 and delay in movement onset (akinesia) [20].

95 We devised a quantitative version of a clinical maneuver commonly used to test the stepping  
96 response, the pull test, in which a participant is pulled from behind and must step backwards to  
97 recover balance [8]. By recording the body's motion in response to repeated pulls of varying  
98 intensity, we examined relationships between postural perturbation intensity and stepping  
99 kinematics. We characterized the kinematic control policy of normal postural stepping in control  
100 participants, and then examined how this control is disrupted by PD and by two other conditions  
101 that disrupt postural responses, normal aging and normal pressure hydrocephalus (NPH).

## 102 **Methods**

### 103 *Participants*

104 We studied 29 participants with no musculoskeletal disorder, dementia, or depression (Table 1):  
105 control participants (*Control* group); older participants (*Aged* group); patients with PD based on  
106 UK Brain Bank Criteria [21] (*PD* group); patients with NPH (inclusion criteria: progressive gait  
107 impairment with multiple falls, cognitive symptoms, urinary incontinence, and communicating  
108 hydrocephalus disproportionate to cerebral atrophy). PD patients were tested on their usual  
109 medications. The study protocol was approved by the Institutional Review Board.

### 110 *Quantitative Pull Test Protocol*

111 Participants were pulled from behind by one of us (P.M.) with a firm brisk pull at the shoulders  
112 [22] and were caught if they did not recover balance on their own. This procedure was repeated  
113 for 8-20 trials with varying degrees of pull intensity. A Proreflex camera (Qualisys AB) captured  
114 motion of the right shoulder, elbow, hip, knee, toe, and heel in the sagittal plane. Participants  
115 held their arms folded to prevent reflective marker occlusion.

## 116 *Data Analysis*

117 We recorded the number of steps (steps taken before stopping) and failure rate (fraction of trials  
118 without recovery after 3 steps). We calculated the body's center of mass (*COM*) position using  
119 standard biomechanical equations [23]. We differentiated COM and foot position to obtain COM  
120 and foot velocity and acceleration.

121 A pull test trial consisted of an initial backward motion of the upper body (*perturbation phase*;  
122 Fig. 1A), followed by one or more backward steps (*response phase*; Fig 1B). Pull onset was the  
123 time when COM acceleration exceeded 15 cm/s<sup>2</sup>. Step onset and landing were the times when  
124 the ankle marker's velocity crossed a 3 cm/s threshold for the first step (Fig. 1C). We quantified  
125 perturbation intensity as the average COM acceleration after pull onset and before step onset  
126 (shaded area in lower panel of Fig. C). The response (first step) was characterized by reaction  
127 time (time to step onset; Fig. 1C), horizontal amplitude (step length), and duration (time from  
128 step onset to step landing).

## 129 *Statistical Analysis*

130 We computed linear correlation between selected kinematic variables. We performed ANOVA  
131 with corrections for multiple comparisons using Tukey's method of Honest Significant  
132 Differences (JMP, SAS Institute), and with significance set at alpha=0.05.

## 133 **Results**

134 Participants did not differ in sex ratio, height, weight, or cognitive scores (Montreal Cognitive  
135 Assessment [24]). Control participants were younger than other groups, as intended (Table 1).  
136 PD and NPH participants had similar UPDRS III scores. Pull test scores differed across groups  
137 (ANOVA,  $p < 0.0001$ ): Control and Aged participants exhibited normal recovery (pull test score

138 0); PD and NPH had higher pull test scores than Control and Aged groups ( $t$  test,  $p < 0.05$ ); and  
139 NPH had higher pull test scores than PD participants ( $t$  test,  $p = 0.002$ ; Table 1).

140 Participants differed in number of steps (steps taken before stopping) and failure rate (fraction of  
141 trials without recovery after 3 steps; Table 1; ANOVA,  $p < 0.001$ ). Control participants all  
142 recovered in one step in all trials, regardless of pull intensity. Aged and PD groups more steps  
143 than Control ( $p < 0.05$ ) and less than NPH ( $p < 0.01$ ). NPH participants failed more frequently than  
144 Control and Aged  $p < 0.01$ ).

145 Because all control participants recovered their balance in once step, we focused our analysis on  
146 the first step. We looked for group differences in first step features that might explain why  
147 participants in PD and NPH groups had higher failure rates.

148 The kinematics of a successful trial illustrate how postural stability may be regained after a pull.  
149 The COM initially accelerated backward after a pull, away from its initial position under the base  
150 of support (arrows in Fig. 1A; upper panel of Fig. 1D). The first step landed well behind the  
151 COM, which stopped the COM's backward motion and restored postural stability (Fig. 1B; upper  
152 panel of Fig. 1D). Failure to recover is illustrated in a trial for an NPH participant (Fig. 1D,  
153 lower panel). After a short first step, the COM continued to move backwards in spite of  
154 additional short steps.

155 Initial COM acceleration values varied widely, as intended, within each participant, and ranged  
156 between 20 and 340  $\text{cm/s}^2$ . We examined the time course of COM velocity after the first step to  
157 establish how quickly participants regained their balance in a subset of trials with matched initial  
158 COM acceleration. Control participants' speed decreased from the end of the first step ( $t=0$ ) to  
159 near 0 at  $t=1$  s (Fig. 2A). Aged participants' speed decreased to the same value as Control at  $t=1$  s

160 (Tukey HSD;  $p > 0.1$ ), though their intermediate speeds were higher than for Control ( $p = 0.0003$  at  
161 0.25s;  $p < 0.0001$  at 0.5s). PD participants' speed was higher than for Control ( $p = 0.0002$ ) and  
162 Aged ( $p < 0.05$ ) groups at  $t = 1$  s. NPH participants' speed remained the highest across groups at  
163  $t = 1$  s ( $p < 0.0001$  vs PD group speed). Thus, PD and NPH participants were still moving 1 second  
164 after the first step ended. These results are consistent with the groups' rankings in number of  
165 steps and failure rates (Table 1).

166 Pulls of greater intensity caused faster and larger changes in COM position (Fig. 2B, upper  
167 panel), which were followed by steps of earlier onset, shorter duration, and larger amplitude (Fig.  
168 2B, lower panel). This finding suggests a kinematic control policy for postural stepping: step  
169 latency and amplitude are scaled to the intensity of postural perturbation, so that the foot lands  
170 sufficiently behind the COM to stop its motion. We examined Control participants' responses for  
171 evidence of this policy and then examined how it might be disrupted in the other groups.

172 There was a marked linear correlation between step length and initial COM acceleration, both  
173 within and across Control participants (Figure 3A, 3B;  $r = 0.80 \pm 0.2$ , mean  $\pm$  SEM;  $p < 0.01$  for  
174 each participant). Similarly, there was an inverse correlation between reaction time and initial  
175 COM acceleration, (Figure 4A, 4B;  $r = 0.68 \pm 0.2$ ;  $p < 0.05$  in each participant). By contrast, first  
176 step duration did not significantly vary across trials (ANOVA,  $p > 0.05$ , mean  $r = 0.35 \pm 0.2$ ).

177 These correlations are a plausible mechanism for stepping responses' success: larger  
178 perturbations are handled by making the first step of larger amplitude and earlier onset, so that  
179 the foot lands further behind the moving body and has a better chance of halting its motion.

180 The correlation of step length and initial COM acceleration is characterized by a slope and a y-  
181 intercept. The slope indicates how much longer the step is in response a larger initial acceleration



182 and represents a scaling factor between acceleration and step length. The correlation between  
183 step length and initial COM acceleration had a lower slope in the Aged, PD, and NPH groups  
184 compared to Control (Figure 3B, 3C; ANOVA,  $p < 0.0001$ , Control vs. Aged, Tukey HSD,  
185  $p = 0.002$ , Control vs. PD, Tukey HSD,  $p = 0.0003$ , Control vs. NPH, Tukey HSD,  $p < 0.0001$ ).  
186 Aged participants had a higher slope than NPH participants (Aged vs. NPH, Tukey HSD,  
187  $p = 0.04$ ), but otherwise slope was not significantly different among Aged, PD, and NPH groups  
188 ( $p > 0.05$  for all other comparisons, Tukey HSD).

189 The correlation's y-intercept indicates, in practice, the smallest possible step that a participant  
190 takes in response to the smallest possible initial COM acceleration. It raises the entire correlation  
191 line by this amount, and thus indicates a bias--a minimum amount of step length that is added to  
192 every step, regardless of perturbation magnitude. The step length correlation's intercept was  
193 higher in Aged and PD groups compared to Control (Figure 3B, 3D; Aged vs. Control, Tukey  
194 HSD,  $p = 0.006$ , PD vs. Control, Tukey HSD,  $p = 0.02$ ), and smaller in the NPH group compared to  
195 Aged (Tukey HSD,  $p = 0.04$ ).

196 The lower slope values indicate that the step length of Aged, PD, and NPH participants did not  
197 increase by a normal amount in response to increasing perturbations. For sufficiently large COM  
198 accelerations, step length of Aged and PD participants was smaller than for Control (Figure 4B).  
199 Step length in the NPH group was shorter than for the Control group for most of the range of  
200 COM accelerations (Figure 4B). The higher intercept values of Aged and PD participants, on the  
201 other hand, made their steps longer than they would have otherwise been. As a result, for Aged  
202 and PD groups, the first step was longer than necessary in the range of smaller COM  
203 accelerations, and less abnormally short for larger COM accelerations (Figure 4B). An increase

204 in the intercept thus countered the effect of slope reduction and partially compensated for the  
205 loss of adequate scaling of step size to perturbation magnitude in Aged and PD groups. For  
206 example, step length for the PD group was shorter than normal only for accelerations above ~100  
207 cm/s<sup>2</sup> (Figure 4B) because of the higher intercept of this group's correlation. This effect was not  
208 seen in the NPH group.

209 The correlation between reaction time and initial COM acceleration did not significantly vary  
210 across groups (Figure 4; slope, ANOVA,  $p=0.45$ , all Tukey HSD comparisons,  $p>0.45$ ; intercept,  
211 ANOVA,  $p=0.10$ , all Tukey HSD comparisons,  $p>0.08$ ).

## 212 **Discussion**

213 Kinematic analysis of a clinical test of postural stability revealed that the normal response to  
214 postural perturbations across a wide range of intensities is to recover by scaling the first step's  
215 amplitude and latency to the body's initial acceleration. These scaling relationships indicate a  
216 *kinematic strategy* for successful recovery from postural perturbations of different intensities:  
217 increasing step length and decreasing reaction time allows the body to recover balance by  
218 placing the foot further behind the center of mass, and sooner, in response to greater postural  
219 perturbations.

220 Aged participants successfully recovered but took more than one step. PD and NPH participants  
221 took more steps and had higher failure rates. The slope of the correlation between step length and  
222 postural perturbation magnitude was reduced in all 3 groups, and its intercept was increased in  
223 Aged and PD groups. Reaction time scaling to postural perturbation was normal in Aged, PD,  
224 and NPH groups.

225 The slope reduction in step length scaling in Aged, PD, and NPH groups offers a kinematic  
226 explanation for failure to recover balance in the pull test. For larger perturbations, step size was  
227 abnormally small, so that the foot was not placed far enough behind the body to stop its motion.  
228 Aged participants exhibited the same type of postural stepping abnormality, reduced step length  
229 scaling, as PD participants, though this reduction was less than in the PD group. Aged and PD  
230 groups also exhibited a compensatory increase in the intercept of the correlation between body  
231 acceleration and step size. This compensatory change was of similar magnitude in both groups. It  
232 may have been sufficient to counter the smaller amount of slope reduction in the Aged group and  
233 thus explain their lower failure rate in the pull test (Table 1). The intercept increase may have not  
234 been sufficient to counter the larger slope reduction of the PD group, which potentially accounts  
235 for the group's higher failure rate.

236 Regarding the symptom complex of bradykinesia (bradykinesia proper, hypokinesia, akinesia;  
237 see Introduction) [20], our findings indicate a postural stepping abnormality that consists of  
238 hypokinesia: steps were shorter than they needed to be to allow balance recovery in PD and NPH  
239 groups. By contrast, these participants did not show evidence of delayed movement onset  
240 (akinesia). This finding could reflect normal control of step reaction time in the groups we  
241 studied, or a combined effect of reaction time increase, known to be caused by PD [25] and  
242 compensatory reaction time reduction to counteract first step hypokinesia. Similarly, there was  
243 no evidence of movement slowing.

244 Finding a similar motor control abnormality underlying abnormal postural stepping across Aged,  
245 PD, and NPH groups suggests that these conditions share brain changes responsible for postural  
246 instability. A shared pathology for PD and NPH is consistent with the overlap of other clinical

247 manifestations of these disorders, such as bradykinesia of rapid repeated leg and foot movements  
248 [26]. Similarly, aging is accompanied by brain changes also seen in PD, including loss of  
249 neurons in the substantia nigra and parkinsonian movement abnormalities [27]. In aging,  
250 however, these abnormalities may be subclinical, rather than entirely absent, thanks to  
251 compensatory mechanisms like the rise in the intercept of the step length scaling relationship.  
252 The lack of evidence of compensation (increase in intercept) in the NPH group may indicate that  
253 compensatory mechanisms are not available when kinematic scaling relationships are severely  
254 disrupted: NPH participants' slopes for the step size vs. initial acceleration scaling were nearly  
255 flat. Alternatively, NPH may disrupt additional gait control mechanisms not affected by aging or  
256 PD.

257 Elderly individuals are known to take multiple steps when recovering from a postural  
258 perturbation [28–31]. Step kinematics differed from those of young participants in some studies  
259 [29,31] but were normal in another study [30]. Our results may explain this variation as  
260 emerging from the changes in the scaling relationship of step length to perturbation magnitude.  
261 Thanks to the compensatory effect of increased intercept, aged participants in our study took  
262 abnormally short steps only for perturbations greater than  $150 \text{ cm/s}^2$  (Fig. 3B).

263 PD patients have been reported to take abnormally short steps in compensatory stepping, as we  
264 found, but also to exhibit increased reaction time, unlike our findings [17]. Differences in how  
265 perturbations were applied may account for this discrepancy: platform motion is likely more  
266 sudden than a manual pull at the shoulders, and could thus unmask reaction time increases not  
267 visible in the pull test. Another study [18] did not find an effect of PD on step length, which we  
268 also found for initial body accelerations below  $100 \text{ cm/s}^2$ . Some of these findings, such as

269 reduced static sway, may reflect the same kinematic abnormality (hypokinesia) we identified,  
270 while others may be independent additional contributors to impaired postural stepping.

271 Postural response impairment in PD has been examined within a model of standing as the  
272 balancing of a two-segment inverted pendulum, in which the CNS acting as a multivariate  
273 feedback controller that processes sensory information, estimates body kinematics, and sends  
274 appropriate motor commands scaled by feedback gains [32]. PD patients in this study had  
275 abnormal feedback gains and were unable to scale postural responses to changes in perturbation  
276 amplitude. Although these results were observed in a fixed-support postural task, the model  
277 offers a convincing mechanism to explain our findings for normal and abnormal stepping  
278 responses. Consistent with this model, our findings show that the normal stepping response is  
279 governed by a linear gain between perturbation magnitude and postural response, and that PD  
280 reduces this gain so that postural responses are scaled down.

281 While gait parameters have been studied in detail for NPH patients [33], our understanding of  
282 postural control in these patients remains limited. NPH patients appear to have a larger static  
283 sway area and higher backwards directed COM velocity during upright stance [34], but no  
284 dynamic studies have examined NPH patients' postural control in detail. The patients in our  
285 study were essentially unable to scale step length to increases in perturbation amplitude. This  
286 resulted in the highest percentage of inadequate responses among the groups we studied.

287 We chose the COM's initial backward acceleration as the measure of perturbation intensity,  
288 rather than the force applied at the shoulders. The COM's initial acceleration results from the  
289 combined effect of pull force and inertial resistance due to a person's mass, height, posture, and  
290 stiffness (mechanical impedance). COM acceleration thus reflects the *effective* intensity of the

291 pull, that is, how effectively a pull's force displaces the body away from a stable posture. We  
292 would argue that the relevant variable that ultimately leads to loss of balance is the body's  
293 motion towards the limits of the base of support, and not the force applied at the shoulders. The  
294 body's motion is what needs to be countered: a fall is, after all, the end-result of the COM being  
295 in the wrong position, and headed in the wrong direction, relative to the base of support for too  
296 long. Therefore, even though COM acceleration is not an independent variable (as it is an  
297 outcome of the applied force), we consider it an appropriate measure of perturbation intensity in  
298 the pull test.

299 An advantage of using COM acceleration as a measure of perturbation intensity is that it is not  
300 confounded by anticipatory strategies. If participants leaned forward or stiffened their body in  
301 anticipation of the pull, the effect of a given pull force would be diminished. These strategies are  
302 equivalent to increasing inertial resistance. Their dampening effect on applied force is thus  
303 accurately reflected in the COM's initial acceleration and does not confound the estimate of  
304 perturbation intensity.

305 A kinematic explanation of postural instability as a manifestation of hypokinesia suggests that  
306 postural responses should improve with treatments that benefit other forms of hypokinesia. At  
307 this time, whether any treatment improves postural instability is in our opinion unclear.

308 Treatment of PD with levodopa is associated with reduced frequency of falls [35] and with  
309 improved scores on all motor subcomponents of the UPDRS, including the subscale related to  
310 postural control and gait [36]. However, levodopa worsened the ability to scale responses to  
311 large perturbation amplitudes in a fixed-support strategy postural task [37]. Postural instability  
312 has been reported not to benefit from deep brain stimulation (DBS) when assessed with clinical

313 measures [38], but showed clear benefit from DBS (Nantel *et al.*, 2012) and pallidotomy [41]  
314 when assessed with posturography. Compensatory stepping has been shown to be unaffected by  
315 globus pallidus internus DBS while subthalamic nucleus DBS has been associated with delays in  
316 the preparatory phase prior to stepping and more steps required to regain balance [42]. Treatment  
317 of NPH with ventriculoperitoneal shunting has benefit on gait [43,44]; whether this treatment  
318 improves postural responses is unclear.

319 We found that successful recovery of balance in postural stepping is mediated by a kinematic  
320 mechanism (scaling of first step length and reaction time to initial body motion) and that  
321 parkinsonian postural instability can be explained by hypokinesia of the first step. People with  
322 parkinsonism have difficulty recovering balance because their reactive steps are too small  
323 relative to the size of the imposed perturbation, and not because of a delay in step initiation.  
324 Further quantitative testing of postural stepping may clarify whether treatments that are effective  
325 for other forms of hypokinesia, such as dopaminergic medications and DBS, can also benefit  
326 parkinsonian postural instability.

## 327 **Acknowledgments**

328 We thank Paul Greene and Ash Rao for discussion.

## 329 **Authors' Roles**

- 330 1) Research project: A. Conception, B. Organization, C. Execution;  
331 2) Statistical Analysis: A. Design, B. Execution, C. Review and Critique;  
332 3) Manuscript: A. Writing of the first draft, B. Review and Critique.

333 RAM: 1BC, 2AB, 3AB

334 JCC: 1C, 2C, 3B

335 AW: 1C

336 GMM: 1BC, 3C

337 PM: 1ABC, 2ABC, 3B

338 **Financial Disclosures for Preceding 12 Months**

339 Stock Ownership in medically-related fields: RAM: None; JCC: None; AW: None; GMM: None;

340 PM: None

341 Intellectual Property Rights: RAM: None; JCC: None; AW: None; GMM: None; PM: None

342 Consultancies: RAM: None JCC: None; AW: None; GMM: None; PM: None

343 Expert Testimony: RAM: None, JCC: None; AW: None; GMM: None; PM: Yes

344 Advisory Boards: RAM: Data Safety Monitoring Board, Synerfuse, Inc. JCC: None; AW: None;

345 GMM: None; PM: None

346 Partnerships: RAM: None JCC: None; AW: None; GMM: None; PM: None

347 Contracts: RAM: None JCC: None; AW: None; GMM: None; PM: None

348 Honoraria: RAM: None JCC: None; AW: None; GMM: None; PM: None

349 Royalties: RAM: None JCC: None; AW: None; GMM: None; PM: None

350 Grants: RAM: MnDRIVE; JCC: None; AW: None; GMM: None; PM: NINDS

351 Other: RAM: None JCC: None; AW: None; GMM: None; PM: None



## 352 **References**

- 353 1 Horak FB, Macpherson JM. Postural Orientation and Equilibrium. In: *Comprehensive*  
354 *Physiology*. American Cancer Society 2011. 255–92. doi:10.1002/cphy.cp120107
- 355 2 McIlroy W, Maki B. Task constraints on foot movement and the incidence of compensatory  
356 stepping following perturbation of upright stance. *Brain Res* 1993;**616**:30–8.
- 357 3 Maki BE, McIlroy WE. The role of limb movements in maintaining upright stance: the  
358 ‘change-in-support’ strategy. *Phys Ther* 1997;**77**:488–507.
- 359 4 Rogers MW, Mille M-L. Chapter 5 - Balance perturbations. In: Day BL, Lord SR, eds.  
360 *Handbook of Clinical Neurology*. Elsevier 2018. 85–105. doi:10.1016/B978-0-444-63916-  
361 5.00005-7
- 362 5 Sheldon J. On the natural history of falls in old age. *Br Med J* 1960;**2**:1685–90.
- 363 6 Sturnieks DL, St George R, Lord SR. Balance disorders in the elderly. *Neurophysiol Clin*  
364 *Clin Neurophysiol* 2008;**38**:467–78. doi:10.1016/j.neucli.2008.09.001
- 365 7 Soh S-E, McGinley JL, Watts JJ, *et al*. Determinants of health-related quality of life in  
366 people with Parkinson’s disease: a path analysis. *Qual Life Res Int J Qual Life Asp Treat*  
367 *Care Rehabil* 2013;**22**:1543–53. doi:10.1007/s11136-012-0289-1
- 368 8 Bloem BR, Beckley DJ, van Hilten BJ, *et al*. Clinimetrics of postural instability in  
369 Parkinson’s disease. *J Neurol* 1998;**245**:669–73.
- 370 9 Horak F, Nutt J, Nashner L. Postural inflexibility in parkinsonian subjects. *J Neurol Sci*  
371 1992;**111**:46–58.
- 372 10 Adkin AL, Frank JS, Jog MS. Fear of falling and postural control in Parkinson’s disease.  
373 *Mov Disord Off J Mov Disord Soc* 2003;**18**:496–502. doi:10.1002/mds.10396

- 374 11 Carpenter MG, Allum JH, Honegger F, *et al.* Postural abnormalities to multidirectional  
375 stance perturbations in Parkinson's disease. *J Neurol Neurosurg Psychiatry* 2004;**75**:1245–  
376 54. doi:10.1136/jnnp.2003.021147
- 377 12 Dimitrova D, Horak FB, Nutt JG. Postural muscle responses to multidirectional translations  
378 in patients with Parkinson's disease. *J Neurophysiol* 2004;**91**:489–501.  
379 doi:10.1152/jn.00094.2003
- 380 13 Park S, Horak FB, Kuo AD. Postural feedback responses scale with biomechanical  
381 constraints in human standing. *Exp Brain Res* 2004;**154**:417–27. doi:10.1007/s00221-003-  
382 1674-3
- 383 14 Ganesan M, Pal PK, Gupta A, *et al.* Dynamic posturography in evaluation of balance in  
384 patients of Parkinson's disease with normal pull test: concept of a diagonal pull test.  
385 *Parkinsonism Relat Disord* 2010;**16**:595–9. doi:10.1016/j.parkreldis.2010.08.005
- 386 15 Horak FB, Dimitrova D, Nutt JG. Direction-specific postural instability in subjects with  
387 Parkinson's disease. *Exp Neurol* 2005;**193**:504–21. doi:10.1016/j.expneurol.2004.12.008
- 388 16 King LA, George RJS, Carlson-Kuhta P, *et al.* Preparation for Compensatory Forward  
389 Stepping in Parkinson's Disease. *Arch Phys Med Rehabil* 2010;**91**:1332–8.  
390 doi:10.1016/j.apmr.2010.05.013
- 391 17 Schlenstedt C, Mancini M, Horak F, *et al.* Anticipatory Postural Adjustment During Self-  
392 Initiated, Cued, and Compensatory Stepping in Healthy Older Adults and Patients With  
393 Parkinson Disease. *Arch Phys Med Rehabil* 2017;**98**:1316-1324.e1.  
394 doi:10.1016/j.apmr.2017.01.023

- 395 18 McVey MA, Amundsen S, Barnds A, *et al.* The effect of moderate Parkinson's disease on  
396 compensatory backwards stepping. *Gait Posture* 2013;**38**:800–5.  
397 doi:10.1016/j.gaitpost.2013.03.028
- 398 19 Luchies CW, Alexander NB, Schultz AB, *et al.* Stepping responses of young and old adults  
399 to postural disturbances: kinematics. *J Am Geriatr Soc* 1994;**42**:506–12.
- 400 20 Hallett M. Bradykinesia: why do Parkinson's patients have it and what trouble does it cause?  
401 *Mov Disord Off J Mov Disord Soc* 2011;**26**:1579–81. doi:10.1002/mds.23730
- 402 21 Hughes AJ, Daniel SE, Kilford L, *et al.* Accuracy of clinical diagnosis of idiopathic  
403 Parkinson's disease: a clinico-pathological study of 100 cases. *J Neurol Neurosurg*  
404 *Psychiatry* 1992;**55**:181–4.
- 405 22 Lang A. Clinical rating scales and videotape analysis. In: *Therapy of Parkinson's disease*.  
406 New York: : Marcel Dekker 1995. 21–46.
- 407 23 Winter DA. *Biomechanics and Motor Control of Human Movement*. New York: : John Wiley  
408 and Sons 1990.
- 409 24 Nasreddine ZS, Phillips NA, Bedirian V, *et al.* The Montreal Cognitive Assessment, MoCA:  
410 a brief screening tool for mild cognitive impairment. *J Am Geriatr Soc* 2005;**53**:695–9.  
411 doi:10.1111/j.1532-5415.2005.53221.x
- 412 25 Evarts EV, Teravainen H, Calne DB. Reaction time in Parkinson's disease. *Brain*  
413 1981;**104**:167–86.
- 414 26 Hallett M. Parkinson Revisited: Pathophysiology of Motor Signs. In: Gordin A, Kaakkola S,  
415 Teravainen H, eds. *Adv Neurol*. Philadelphia: : Lippincott Williams & Wilkins 2003. 9–18.
- 416 27 Ross GW, Petrovitch H, Abbott RD, *et al.* Parkinsonian signs and substantia nigra neuron  
417 density in decedents elders without PD. *Ann Neurol* 2004;**56**:532–9. doi:10.1002/ana.20226

- 418 28 Wolfson L, Whipple R, Amerman P, *et al.* Stressing the postural response. A quantitative  
419 method for testing balance. *J Am Geriatr Soc* 1986;**34**:845.
- 420 29 Luchies CW, Alexander NB, Schultz AB, *et al.* Stepping responses of young and old adults  
421 to postural disturbances: kinematics. *J Am Geriatr Soc* 1994;**42**:506–12.
- 422 30 McIlroy WE, Maki BE. Age-related changes in compensatory stepping in response to  
423 unpredictable perturbations. *J Gerontol A Biol Sci Med Sci* 1996;**51**:M289.
- 424 31 Thelen DG, Wojcik LA, Schultz AB, *et al.* Age differences in using a rapid step to regain  
425 balance during a forward fall. *J Gerontol A Biol Sci Med Sci* 1997;**52**:M8.
- 426 32 Kim S, Horak FB, Carlson-Kuhta P, *et al.* Postural feedback scaling deficits in Parkinson’s  
427 disease. *J Neurophysiol* 2009;**102**:2910–20. doi:10.1152/jn.00206.2009
- 428 33 Stolze H, Kuitz-Buschbeck JP, Drucke H, *et al.* Comparative analysis of the gait disorder of  
429 normal pressure hydrocephalus and Parkinson’s disease. *J Neurol Neurosurg Psychiatry*  
430 2001;**70**:289–97.
- 431 34 Blomsterwall E, Svantesson U, Carlsson U, *et al.* Postural disturbance in patients with  
432 normal pressure hydrocephalus. *Acta Neurol Scand* 2000;**102**:284–91.
- 433 35 Parashos SA, Bloem BR, Browner NM, *et al.* What predicts falls in Parkinson disease?:  
434 Observations from the Parkinson’s Foundation registry. *Neurol Clin Pract* 2018;**8**:214–22.  
435 doi:10.1212/CPJ.0000000000000461
- 436 36 Vu TC, Nutt JG, Holford NHG. Progression of motor and nonmotor features of Parkinson’s  
437 disease and their response to treatment. *Br J Clin Pharmacol* 2012;**74**:267–83.  
438 doi:10.1111/j.1365-2125.2012.04192.x
- 439 37 Horak FB, Frank J, Nutt J. Effects of dopamine on postural control in parkinsonian subjects:  
440 scaling, set, and tone. *J Neurophysiol* 1996;**75**:2380–96.

- 441 38 Brandmeir NJ, Brandmeir CL, Carr D, *et al.* Deep Brain Stimulation for Parkinson Disease  
442 Does not Worsen or Improve Postural Instability: A Prospective Cohort Trial. *Neurosurgery*  
443 2018;**83**:1173–82. doi:10.1093/neuros/nyx602
- 444 39 Shivitz N, Koop MM, Fahimi J, *et al.* Bilateral subthalamic nucleus deep brain stimulation  
445 improves certain aspects of postural control in Parkinson’s disease, whereas medication does  
446 not. *Mov Disord Off J Mov Disord Soc* 2006;**21**:1088–97. doi:10.1002/mds.20905
- 447 40 Nantel J, McDonald JC, Bronte-Stewart H. Effect of medication and STN-DBS on postural  
448 control in subjects with Parkinson’s disease. *Parkinsonism Relat Disord* 2012;**18**:285–9.  
449 doi:10.1016/j.parkreldis.2011.11.005
- 450 41 Bronte-Stewart HM, Minn AY, Rodrigues K, *et al.* Postural instability in idiopathic  
451 Parkinson’s disease: the role of medication and unilateral pallidotomy. *Brain J Neurol*  
452 2002;**125**:2100–14.
- 453 42 St George RJ, Carlson-Kuhta P, King LA, *et al.* Compensatory stepping in Parkinson’s  
454 disease is still a problem after deep brain stimulation randomized to STN or GPi. *J*  
455 *Neurophysiol* 2015;**114**:1417–23. doi:10.1152/jn.01052.2014
- 456 43 Williams M, Thomas G, Lateur B de, *et al.* Objective Assessment of Gait in Normal-  
457 Pressure Hydrocephalus. *Am J Phys Med Rehabil* 2008;**87**:39–45.  
458 doi:10.1097/PHM.0b013e31815b6461
- 459 44 Giordan E, Palandri G, Lanzino G, *et al.* Outcomes and complications of different surgical  
460 treatments for idiopathic normal pressure hydrocephalus: a systematic review and meta-  
461 analysis. *J Neurosurg* 2018;**131**:1024–36. doi:10.3171/2018.5.JNS1875  
462

## 463 **Figure Legends**

464 **Figure 1.** Trajectories of motion capture markers from pull onset ( $t=0$ ; grey) to  $t=250$  ms (black)  
465 in a pull test trial. Arrows indicate horizontal center-of-mass (COM) position. **B.** Marker  
466 trajectories up to time of first step landing ( $t=670$  ms). **C.** Kinematic quantities in a pull test trial  
467 for a CTL participant. **D.** Horizontal position of COM (solid), heel, toe (dashed) during a single  
468 trial in individual CTL (upper traces) and NPH (lower traces) participants.

469 **Figure 2.** **A.** COM velocity after first step landing for trials with average COM acceleration  
470 matched across groups. **B.** Time course of COM and foot (heel) position for selected trials of  
471 different perturbation magnitude (randomly interleaved) in a CTL participant.

472 **Figure 3.** **A.** Step length vs. initial COM acceleration for all trials for one CTL and one PD  
473 participant. Lines = linear correlation. **B.** Correlation lines between step length and initial COM  
474 acceleration. Shading = standard error. **C.** Slope (mean  $\pm$  SEM) of linear correlation between  
475 step length and initial COM acceleration. \*,  $p<0.05$ ; \*\*,  $p<0.01$ ; \*\*\*,  $p<0.001$  (Tukey HSD  
476 contrasts). **D.** Intercept (mean  $\pm$  SEM) of linear regression between step length and initial COM  
477 acceleration.

478 **Figure 4.** **A.** Reaction time vs. initial COM acceleration for all trials for one CTL and one PD  
479 participant. Lines = linear correlation. **B.** Correlation lines between reaction time and initial  
480 COM acceleration for each participant group. **C.** Slope (mean  $\pm$  SEM) of linear regression  
481 between reaction time and initial COM acceleration. \*,  $p<0.05$ ; \*\*,  $p<0.01$ ; \*\*\*,  $p<0.001$  (Tukey  
482 HSD contrasts). **D.** Intercept (mean  $\pm$  SEM) of linear regression between reaction time and initial  
483 COM acceleration.

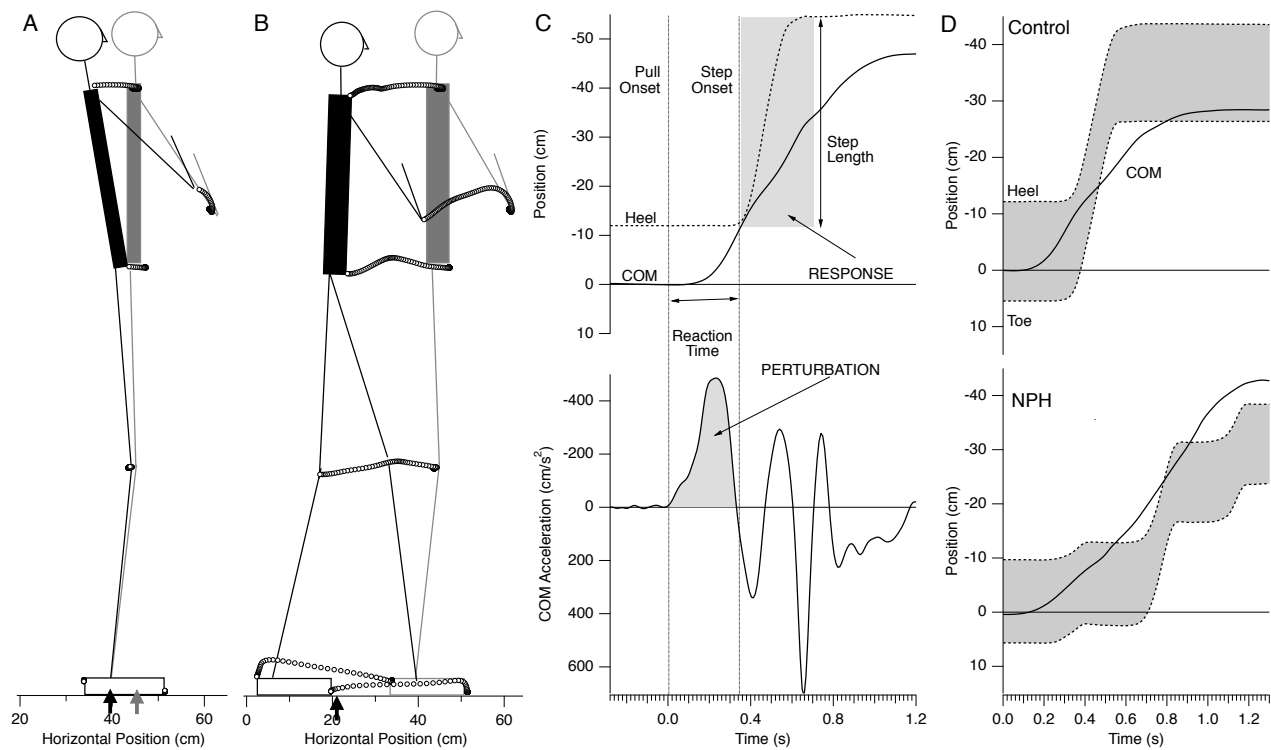

Figure 1

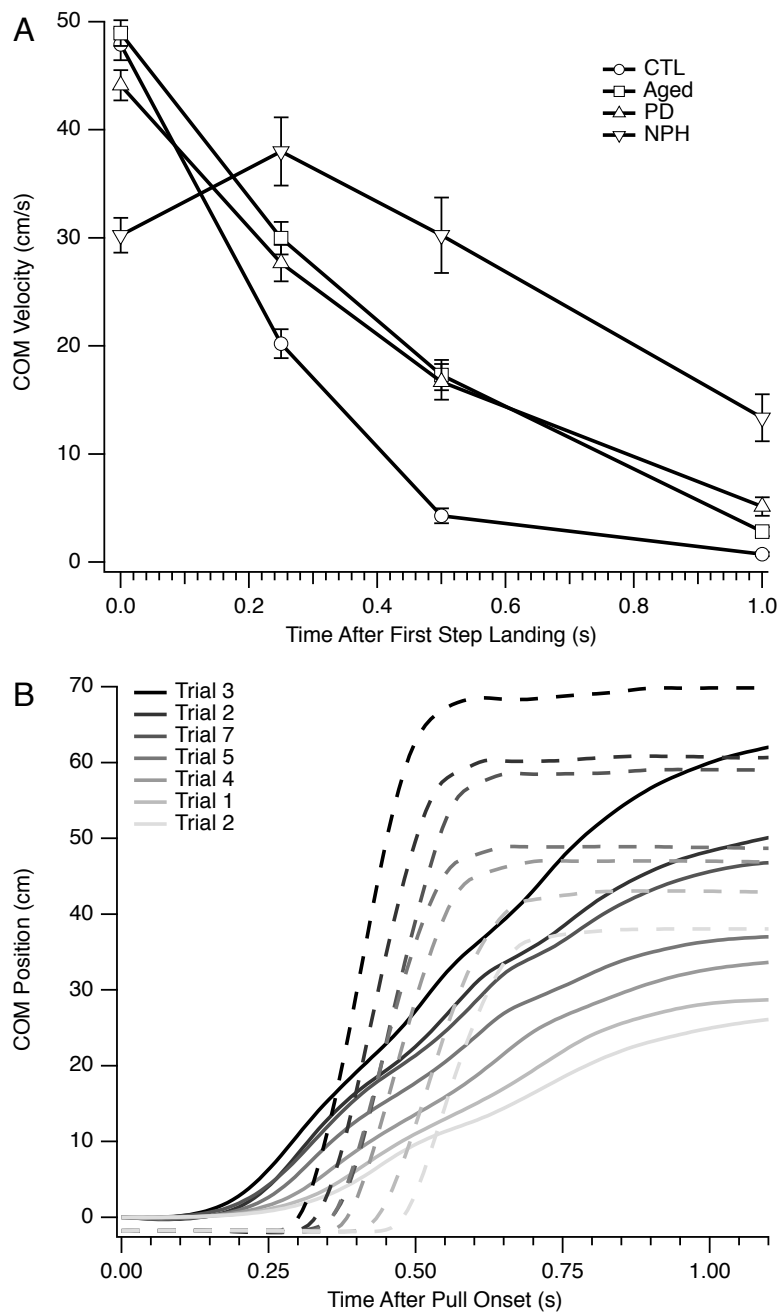

Figure 2



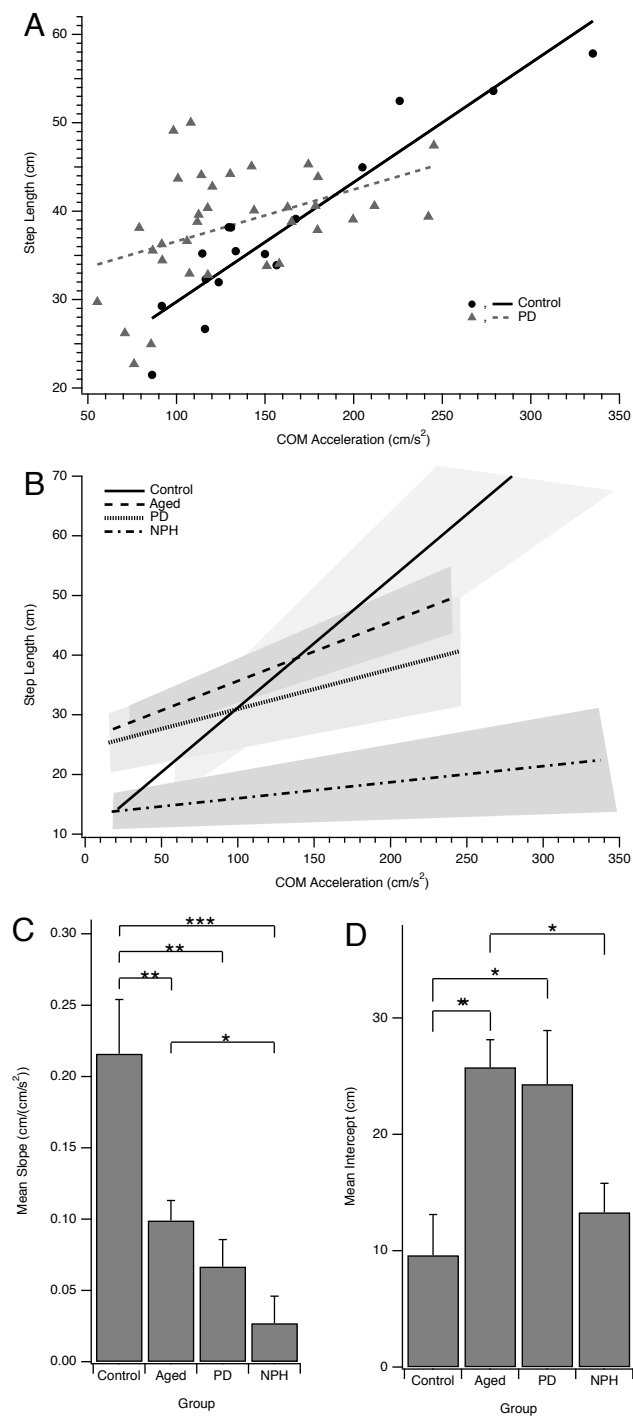

Figure 3

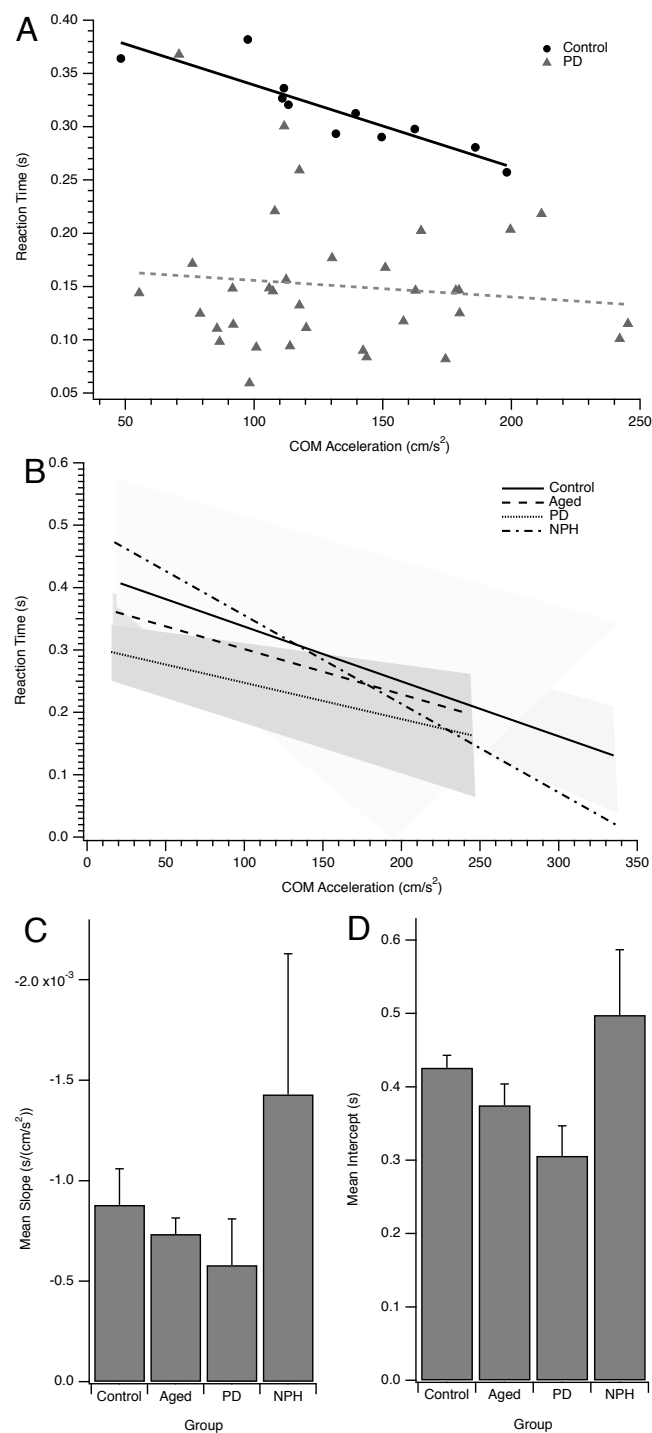

Figure 4
